# During hippocampal inactivation, grid cells maintain their synchrony, even when the grid pattern is lost

Noam Almog<sup>1</sup>, Gilad Tocker<sup>1,2ξ</sup>, Tora Bonnevie<sup>3∞</sup>, Edvard Moser<sup>3</sup>, May-Britt Moser<sup>3</sup> and Dori Derdikman<sup>1‡</sup>

<sup>1</sup>*Rappaport Faculty of Medicine and Research Institute, Technion – Israel Institute of Technology.*

<sup>2</sup>*Gonda Multidisciplinary Brain Research Center, Bar Ilan University.*

<sup>3</sup>*Kavli Institute for Systems Neuroscience and Centre for Neural Computation, Norwegian University of Science and Technology.*

‡Corresponding author. Email: [derdik@technion.ac.il](mailto:derdik@technion.ac.il)

ξ *Present address: Department of Neurobiology, Northwestern University, Evanston, Illinois.*

∞ *Present address: Department of Neuromedicine and Movement Science, Norwegian University of Science and Technology.*

## Abstract

1 The means by which grid cells form regular, hexagonal spatial firing patterns has been an enigma since  
2 their discovery in the medial entorhinal cortex (MEC). Here we re-analyzed data from Bonnevie et al.  
3 (2013), in which the hippocampus was inactivated and grid cells were recorded in the MEC, to  
4 investigate whether grid cells form an intrinsic network in the MEC, or alternatively, inherit their  
5 network properties from external sources. Specifically, we examined temporal and spatial correlations in  
6 the firing times of simultaneously recorded grid cells before and during hippocampal inactivation. Our  
7 analysis revealed evidence of network coherence in grid cells even in the absence of hippocampal input  
8 to the MEC, both in regular grid cells and in those that became head-direction cells after hippocampal  
9 inactivation. This favors models which suggest that phase relations between grid cells in the MEC are  
10 dependent on intrinsic connectivity within the MEC.

## Introduction

11 Since their discovery in the medial entorhinal cortex (MEC) (Hafting, Fyhn, Molden, Moser, & Moser,  
12 2005) the location and means by which grid cells form their eponymous hexagonal spatial firing patterns

13 has been elusive. Modeling work has suggested that either grid cells are generated intrinsically in the  
14 MEC, for example by a continuous attractor network model (Burak & Fiete, 2009; Couey et al., 2013;  
15 Fuhs & Touretzky, 2006; Giocomo, Moser, & Moser, 2011; Moser, Moser, & Roudi, 2014; Zilli, 2012) or  
16 alternatively have their properties form through an interaction with another region, such as the  
17 hippocampus (Dordek, Soudry, Meir, & Derdikman, 2016; Kropff & Treves, 2008; Stachenfeld, Botvinick,  
18 & Gershman, 2017). To dissociate between these possibilities, we re-analyzed data from Bonnevie et al.  
19 (2013), who inactivated hippocampal input to the MEC, and found that under this condition, the grid  
20 pattern of individual grid cells deteriorated significantly or disappeared entirely. Here we investigated  
21 whether grid cells form an intrinsic network in the entorhinal cortex, or alternatively, inherit their spatial  
22 properties from external sources. Specifically, we examined correlations in the firing times of  
23 simultaneously recorded grid cells before and during hippocampal inactivation, including grid cells that  
24 acquired head directional tuning during inactivation. Our analysis yielded evidence of network  
25 coherence in grid cells even in the absence of hippocampal input to the MEC.

## Results

26 We reanalyzed data from Bonnevie et al. (2013) in which grid cells were recorded before, during and  
27 after hippocampal inactivation (Figure 1A-C). A total of 301 well-separated cells were recorded in the  
28 MEC and parasubiculum across 40 sessions including pre-, during and post-hippocampal inactivation,  
29 with 2-18 simultaneously recorded cells per session. While the runs of pre- and post-inactivation were  
30 analyzed in their entirety, for runs during inactivation we used only the first 45 minutes, during which  
31 the most data were available across all recordings. The analysis showed similar effects on grid behavior  
32 in longer trials as in the first 45 minutes; the average grid score was  $-0.045 \pm 0.119$  for the first 45  
33 minutes and  $-0.049 \pm 0.087$  for the remainder.

34 We searched for evidence of network activity between grid cells in the absence of hippocampal input.  
35 Hence, we examined spike time correlations and spatial firing correlations between simultaneously  
36 recorded cells whose gridness deteriorated during hippocampal inactivation (Figure 1D, 1E). To select  
37 only cells with high gridness before inactivation and low gridness during inactivation, we set a minimal  
38 grid score of 0.3 pre-inactivation and a maximum score of 0.2 during inactivation (Figure 1D). These  
39 thresholds were set subjectively to include the largest number of cells in our cohort, while ensuring  
40 typical grid cell activity pre-hippocampal inactivation and significantly less during hippocampal  
41 inactivation, based on the spatial firing pattern. The use of different thresholds (above 0.5 gridness pre-  
42 inactivation and below 0 gridness during inactivation) did not change our findings (see below).

43 The mean grid score of the selected cells was  $0.85 \pm 0.33$  pre-inactivation and  $-0.05 \pm 0.11$  during  
44 inactivation. Additionally, to ensure that the same cell was not recorded on different electrodes, we  
45 removed any cells from a single recording session whose individual spike times overlapped within a 1ms  
46 window more than 6% of the time (this mostly removed cases with very large overlap that were clearly  
47 artefactual). The mean spike overlap after exclusion was  $0.63\% \pm 0.82$ . Furthermore, we removed any  
48 cells whose grid score did not pass an  $n=250$  shuffling significance test at a 99% threshold (see shuffling  
49 method below) pre-inactivation, and any cell whose grid score passed the same significance test during  
50 inactivation. In total, 63 of 301 cells from 17 of 41 recording sessions met our criteria (Figure 1D),  
51 producing 99 pairs of simultaneously recorded cells, on which the results of this study are based. In our  
52 cohort, firing rates decreased by 45.5% during inactivation, and returned to original levels post-  
53 inactivation (pre  $2.20\text{Hz} \pm 1.39$ , during  $1.21\text{Hz} \pm 0.94$ , and post  $2.13\text{Hz} \pm 1.17$ ). However, overall, the firing  
54 rate did not seem to correlate to temporal or spatial correlations (Figs. 1B, 1C, 1E, S7).

#### 55 Temporal correlations are maintained during loss of gridness

56 We found that several simultaneously recorded grid cell pairs consistently maintained temporal  
57 correlations even as their gridness deteriorated (Figure 2A, 2C). Compared to random shuffling, these  
58 correlations were statistically significant; 72%, 46%, and 68% of correlations passed the shuffling  
59 significance test pre-, during, and post-inactivation, respectively. Of the statistically significant  
60 correlations, 22%, 20%, and 21% were negative for the three respective recording phases, while 50%,  
61 25%, and 47% were positive. Temporal correlations pre- vs. during inactivation were correlated at  $r=0.68$   
62 (Figure 3A,  $P<0.001$ ), and pre- vs. post-inactivation were correlated at  $r=0.77$  (Figure 3A,  $P<0.001$ ). The  
63 strength of the correlation after inactivation demonstrated a slight negative dependence on the grid  
64 score (Figure 3-figure supplement 6). For comparison, the correlation coefficient of temporal  
65 correlations pre- vs. during for each cell from our cohort against each cell not from the same recording  
66 session (1854 pairs total) was  $r = 0.04$  ( $P<0.11$ ). Correlations of pre- vs. during inactivation were very  
67 similar when considering the period of the recordings after 45 minutes (Figure 3-figure supplement 5).  
68 Changing our pre- and during grid score thresholds did not change the results significantly: setting the  
69 thresholds of the grid score to 0.5 (from 0.3) pre- and 0.0 (from 0.2) during inactivation yielded  
70 pre/during temporal correlation of  $r = 0.73$  ( $P<0.001$ ). These correlations were also consistent across  
71 various spike train smoothing windows, in the range of 1ms-2000ms (Figure 2B and Figure 3-figure  
72 supplement 1). This suggests that the origin of the correlations was not a direct synaptic connection  
73 between cells, but rather recurrent network activity and dense connectivity. If the correlations had

74 resulted from direct synaptic connection, they would have been expected to have vanished as the  
75 temporal smoothing windows became larger, but they did not.

#### 76 Spatial correlations are maintained during loss of gridness

77 To examine whether short-range spatial correlations were maintained also during hippocampal  
78 inactivation, we employed a similar method, which compared the correlation coefficient of the 2D firing  
79 rate maps at the same position ( $x, y = 0, 0$ ). Overall, spatial correlations did not persist as consistently as  
80 temporal correlations during hippocampal inactivation; however, some degree of persistence was  
81 present between simultaneously recorded cell pairs. Spatial correlations were correlated to each other  
82 pre-inactivation vs. during inactivation at  $r = 0.54$  (Figure 3C,  $P < 0.001$ ), while pre- vs. post-spatial  
83 correlations were correlated at  $r = 0.82$  (Figure 3C,  $P < 0.001$ ). For a control comparison, the correlation  
84 coefficient of spatial correlations pre- vs during inactivation for each cell from our cohort correlated  
85 against each other cell not from the same recording session, was much lower ( $r = 0.12$ ). The shuffling  
86 significance test found that 54%, 22%, and 54% of spatial correlations were significant pre-, during, and  
87 post- inactivation, respectively. Of the correlations, 13%, 9%, and 13% were significantly negative for all  
88 three recording phases, respectively, while 41%, 13%, and 41% were positive (Figure 3D). Like temporal  
89 correlations, spatial correlations were not affected by smoothing up to 2000 ms of the spike train  
90 (Figure 3-figure supplements 2 and 3). Changing our pre- and during- grid score thresholds did not  
91 change the results significantly; setting the thresholds of grid score to 0.5 (from 0.3) pre- and 0.0 (from  
92 0.2) during inactivation yielded a pre/during spatial correlation of  $r = 0.48$  ( $P < 0.001$ ). Although the  
93 statistical significance was lower overall for spatial correlations than for temporal correlations, the  
94 results for spatial correlations were consistent with those for temporal correlations. Additionally,  
95 plotting temporal and spatial correlations against each other demonstrated a clear linear relationship;  
96 the correlations of temporal to spatial correlations were  $r = 0.90$ ,  $r = 0.84$ , and  $r = 0.91$  for pre-, during,  
97 and post- inactivation, respectively (Figure 3-figure supplement 4).

#### 98 Temporal correlations but not spatial correlations persisted during inactivation for grid-turned- 99 head directional cells

100 In the original Bonnevie et al. (2013) study, a subset of grid cells became head direction cells during  
101 hippocampal inactivation. Cells within our cohort showed a bi-modal distribution of Rayleigh head-  
102 direction tuning scores during inactivation. This enabled selecting the cells that became head-direction  
103 cells (16 of the 63 cells in our cohort, from 3 of the 17 recording sessions; red dots in Figure 4C). We  
104 noticed that pairs from this subset (39/99) showed a lower rate of persistence of spatial correlation  
105 during inactivation. Figure 4A depicts an example of such group of cells from the same recording

106 session. Examining these head direction vs. non-head direction pair clusters separately, temporal  
107 correlations pre- and during inactivation were correlated to each other similarly in both clusters ( $r=0.72$   
108 vs.  $r=0.69$ , respectively, Figure 4D). The difference in correlation value (0.03) was higher than would  
109 result for only 6074 of 10000 randomly assigned clusters of the same size, implying that the two clusters  
110 were statistically indistinguishable with respect to temporal correlations. On the other hand, for spatial  
111 correlations, pre-inactivation compared to during inactivation, the correlation coefficient was  $r=0.68$  in  
112 the non-head directional cluster, and much lower,  $r=0.32$  (Figure 4E) in the head direction cluster. This  
113 difference was higher than would result for 9877 of 10000 randomly assigned clusters of the same size.  
114 However, a possible explanation entails the reduction in firing rate in the head-direction condition  
115 (Figure 4-figure supplement 1). In conclusion, while spatial correlations were probably less persistent in  
116 grid-turned-head direction cells, temporal correlations persisted equally in grid-turned-head direction  
117 cells during hippocampal inactivation, suggesting evidence, even in this subset, of the underlying  
118 network connectivity between the grid cells.

## Discussion

119 This study reanalyzed data from Bonnevie et al. (2013), in which hippocampal input to the MEC was  
120 inactivated. The aim was to examine possible evidence of local grid cell functional connectivity. We  
121 found that despite the disappearance of the grid pattern of these cells during hippocampal inactivation,  
122 temporal correlations between grid cells remained, as did local spatial correlations, although to a lesser,  
123 yet still statistically significant degree. First, these findings assert that hippocampal input does not  
124 account for spatially and temporally correlated activity between grid cells. Second, the consistency of  
125 these correlations across a 1ms to 2000ms spike-time smoothing window indicates that this effect is not  
126 due solely to direct synaptic connectivity, but to recurrent network activity of dense networks in  
127 behavioral time-scales. Last, some grid cells became head-direction cells during hippocampal  
128 inactivation, and their spatial correlations were less dominant; nonetheless, temporal correlations  
129 persisted equally. Taken together, our findings indicate that grid cells are likely to have an underlying  
130 network structure in the MEC, which is compatible with an attractor manifold model of network  
131 behavior (Burak & Fiete, 2009; Couey, et al., 2013; Fuhs & Touretzky, 2006; Giocomo, et al., 2011;  
132 Moser, et al., 2014; Zilli, 2012), and not with feedforward models creating grid cells through summation  
133 of information from the hippocampus (Dordek, et al., 2016; Kropff & Treves, 2008; Stachenfeld, et al.,  
134 2017). We cannot preclude, though, the possibility that grid cells are formed through a different  
135 feedforward process, not involving the hippocampus, or that they are generated through a recurrent

136 loop involving information from both the hippocampus and the entorhinal cortex (Donato, Jacobsen,  
137 Moser, & Moser, 2017).

138 A network model for grid cell firing pattern at least strongly predicts, if not implicitly requires, a  
139 significant level of synchronicity in temporal firing between two networked grid cells (Moser, et al.,  
140 2014). The attractor manifold model for grid pattern generation predicts that even when the network is  
141 deprived of spatial input, in this case from the hippocampus, the activity pattern that is maintained  
142 (though no longer anchored to physical space) would cause nearby cells in the manifold to fire with high  
143 correlation, and more distant cells not to fire (Burak & Fiete, 2009; Dunn, Mørreanaunet, & Roudi, 2014;  
144 Fuhs & Touretzky, 2006; Tocker, Barak, & Derdikman, 2015). This aligns with our observations of both  
145 correlated and anticorrelated activity during inactivation.

146 In addition to the evidence of network activity, we found that the distinct subset of cells that became  
147 head direction-tuned during inactivation, maintained temporal but not spatial correlations during  
148 hippocampal inactivation. This subset of grid-turned-head-direction cells is likely defined by strong input  
149 from the retrosplenial cortex, or the pre- or para- subiculum, which also project into the MEC, and which  
150 dominate these cells' spatial tuning and firing time synchronization in the absence of input from the  
151 hippocampus (Clark & Taube, 2012). Because the conjunctive grid-head direction cells originated from  
152 recordings that did not contain pure grid cells, we did not observe direct evidence of a temporal  
153 correlation between grid cells that became head-direction cells and those that did not. Notably, both  
154 groups were similar in their temporal correlation values before and during inactivation, regardless of  
155 their differences in spatial correlations. This suggests that despite receiving additional spatial input, the  
156 grid cells that became head-direction cells were part of the grid-cell network.

157 Several other experiments have investigated grid cell activity when spatial input was curtailed,  
158 specifically following removal of visual input. In their original paper that described grid cells, Hafting et  
159 al. (2005) observed rat grid cells in darkness, and found that the grid pattern did not deteriorate. More  
160 recently, two studies, by Perez-Escobar et al. (2016) and Chen et al. (2016) that examined mouse grid  
161 cells in darkness reported that the grid pattern deteriorated without visual input. Furthermore, both  
162 studies found that significant temporal correlations were maintained during impaired spatial input to  
163 the entorhinal cortex, in accordance with our findings.

164 The steady synchronicity in our study suggests an underlying network structure in the MEC that is  
165 responsible for grid cell formation. This corroborates the idea of an attractor manifold involved in grid  
166 cell formation.

## Methods

167 The following sections describe the acquisition of the original data from Bonnevie et al. (2013), and the  
168 analytical methods we applied to the data. All code was written in Matlab (V. 2016a). The code was  
169 uploaded to GitHub at [github.com/noamza/muscimol](https://github.com/noamza/muscimol).

### Input data

171 Briefly, the original experiment by Bonnevie et al. (2013) was performed with eight male 3-5 month old  
172 Long-Evans rats, with water available *ad libitum*. The rats were kept on a 12h light, 12h dark schedule  
173 and tested in the dark phase. Rats were implanted with a microdrive connected to four tetrodes of  
174 twisted 17- $\mu\text{m}$  platinum-iridium wire; one bundle was implanted in the MEC in all rats, anteroposterior  
175 0.4–0.5 mm in front of the transverse sinus, mediolateral 4.5–4.6 mm from the midline, and  
176 dorsoventral 1.4–1.8 mm below the dura. Tetrodes were angled 10° in the sagittal plane. For  
177 hippocampal inactivation, cannulae were implanted at a 30° angle in the posterior direction towards the  
178 dorsal hippocampus; 0.24–0.30 $\mu\text{l}$  of the GABA<sub>A</sub> receptor agonist muscimol (5-aminomethyl-3-  
179 hydroxyisoxazole) diluted in PBS was used to inactivate the hippocampus.

180 Rats were run in an open-field 100cm square arena polarized by a single white que card in an otherwise  
181 black environment for a 20 min period, after which muscimol was infused. Subsequently, the firing rate  
182 of all principal cells recorded in the dorsal CA1 region decreased rapidly, ~2.2 mm posterior and lateral  
183 to the infusion site (82 cells, all of which were place cells), with firing rates dropping to 1% of the  
184 baseline rate in 79% of the recorded cells within 20 minutes. Inactivation of the hippocampus had only  
185 minimal impact on the behavior of the rats. Rats then ran for an average of 160 minutes in the open  
186 field. After 6-24 hours, the rats were run for 20 minutes to check for cell recovery and grid stability.

### Quantifying gridness and head direction selectivity

188 For this analysis, we were interested in specifically examining grid cells whose spatial firing pattern was  
189 significantly degraded. To quantify this, we used the generally accepted measure of grid score, which  
190 essentially measures the extent the cell's firing pattern repeats itself at 60° intervals on a two-  
191 dimensional (2D) plane (how hexagonal the firing pattern is). The procedure undertaken to achieve this  
192 calculation is as follows (based on the procedure described in (Sargolini et al., 2006; Tocker, et al., 2015):

193 First, a 2D map of neuron spiking was generated by creating a matrix where the index [i, j] represents  
194 the location in the arena, and the value represents the number of spikes in that location. The arenas  
195 selected for our data were of dimensions 100cm x 100cm; we binned our activity by 2cm x 2cm  
196 intervals. The equivalent matrix for time spent at each location was also created. These two matrixes  
197 were divided by each other element-wise, creating a matrix of firing rates at each location bin.

198 Next, a 2D spatial autocorrelation was performed on the rate map matrix (based on the one described in  
199 Hafting et al. (2005)). Firing fields were identified using a method that treated the smoothed (2D  
200 Gaussian smoothing with  $\sigma=2$ ) autocorrelation matrix as an image, and identified distinct regions  
201 bounded by a given pixel value of  $r$  in all 8 directions whose external values are all less than  $r$ . Typical  
202 grid cell autocorrelations have at least 6 firing fields, at approximately  $60^\circ$  intervals (Hafting, et al.,  
203 2005). Cells whose autocorrelation did not create 6 distinct firing fields for calculating the anulus using  
204 the above method were set to a default grid score of 0. Typical grid cell activity was manifested as  
205 equidistant firing fields at  $60^\circ$  intervals from each other.

206 The final step in calculating the grid score was to create a ring around the center of the smoothed  
207 autocorrelation (2D Gaussian smoothing with  $\sigma=2$ ), with an inner radius small enough to contain the  
208 innermost firing field, and the outer radius large enough to contain the outermost edge of the sixth  
209 closest field. Next, the ring was rotated  $60^\circ$  and correlated to the original. This value was then  
210 subtracted by the value of the ring correlated at a  $30^\circ$  rotation. Since both correlations have values in  
211 the range of  $[-1,1]$ , the range of grid scores is  $[-2, 2]$ .

212 A Rayleigh score from 0 to 1 was used to quantify head directionality of cells, similar to that described in  
213 Tocker et al. (2015).

#### 214 Cell pair correlations

215 To quantify temporal correlations between cells, we calculated the Pearson correlation of their spike  
216 trains (lag = 0ms). For spatial correlations, a 2D Pearson correlation of the rate maps (see Quantifying  
217 Gridness) was performed and compared at  $[0,0]$ . Smoothing was done on the spike trains prior to both  
218 temporal and spatial correlations using a moving average window of 25ms. Smoothing windows from  
219 1ms to 1000ms had little or no impact on the correlation of results (Figure 3-figure supplement 2).

#### 220 Shuffling to measure significance

221 To measure the statistical significance of the correlations, we employed a shuffling method in which  
222 spike trains were randomly shifted cyclically  $n$  times ( $n=1000$  unless stated otherwise) and their



223 correlations recalculated. Correlations were considered significant if they were in the 99<sup>th</sup> percentile  
224 when compared to the shuffled correlations. Positive and negative correlations were determined by  
225 sorting the correlation values in ascending and descending order, respectively, before determining their  
226 percentiles. A correlation in the 99<sup>th</sup> percentile, with values sorted in descending order, was considered  
227 a negative correlation; and values sorted in ascending order were considered a positive correlation.

## Acknowledgements

228 We thank Cindy Cohen for proofreading. We thank Chen Elbak and Irina Reiter for help with experiment  
229 administration. We thank members of the Derdikman lab for fruitful discussions.

## Funding

230 The research was supported by the Israel Science Foundation personal grants #955/13, #2344/16 and  
231 #2655/18, by a Rappaport Institute grant, by the Allen and Jewel Prince Center for Neurodegenerative  
232 Disorders of the Brain grant, and by a joint Technion-Weizmann Adelis foundation grant.

## Conflict of Interest Statement

233 The authors declare that the research was conducted in the absence of any commercial or financial  
234 relationships that could be construed as a potential conflict of interest.

## References

- 235 Bonnevie, T., Dunn, B., Fyhn, M., Hafting, T., Derdikman, D., Kubie, J. L., . . . Moser, M.-B. (2013). Grid  
236 cells require excitatory drive from the hippocampus. *Nature Neuroscience*, *16*(3), 309-317.
- 237 Burak, Y., & Fiete, I. R. (2009). Accurate path integration in continuous attractor network models of grid  
238 cells. *PLoS computational biology*, *5*(2), e1000291.
- 239 Chen, G., Manson, D., Cacucci, F., & Wills, T. J. (2016). Absence of visual input results in the disruption of  
240 grid cell firing in the mouse. *Current Biology*, *26*(17), 2335-2342.
- 241 Clark, B. J., & Taube, J. S. (2012). Vestibular and Attractor Network Basis of the Head Direction Cell Signal  
242 in Subcortical Circuits. [Review]. *Frontiers in Neural Circuits*, *6*. doi: 10.3389/fncir.2012.00007
- 243 Couey, J. J., Witoelar, A., Zhang, S.-J., Zheng, K., Ye, J., Dunn, B., . . . Witter, M. P. (2013). Recurrent  
244 inhibitory circuitry as a mechanism for grid formation. [10.1038/nn.3310]. *Nat Neurosci*, *16*(3),  
245 318-324. doi:  
246 <http://www.nature.com/neuro/journal/v16/n3/abs/nn.3310.html#supplementary-information>

- 247 Donato, F., Jacobsen, R. I., Moser, M.-B., & Moser, E. I. (2017). Stellate cells drive maturation of the  
248 entorhinal-hippocampal circuit. *Science*, *355*(6330), eaai8178. doi: 10.1126/science.aai8178
- 249 Dordek, Y., Soudry, D., Meir, R., & Derdikman, D. (2016). Extracting grid cell characteristics from place  
250 cell inputs using non-negative principal component analysis. [JOUR]. *eLife*, *5*, e10094. doi:  
251 10.7554/eLife.10094
- 252 Dunn, B., Mørreaunet, M., & Roudi, Y. (2014). Correlations and functional connections in a population of  
253 grid cells. *arXiv preprint arXiv:1405.0044*.
- 254 Fuhs, M. C., & Touretzky, D. S. (2006). A spin glass model of path integration in rat medial entorhinal  
255 cortex. *Journal of Neuroscience*, *26*(16), 4266-4276. doi: Doi 10.1523/Jneurosci.1353-05.2006
- 256 Giocomo, Lisa M., Moser, M.-B., & Moser, Edvard I. (2011). Computational Models of Grid Cells. *Neuron*,  
257 *71*(4), 589-603.
- 258 Hafting, T., Fyhn, M., Molden, S., Moser, M.-B., & Moser, E. I. (2005). Microstructure of a spatial map in  
259 the entorhinal cortex. *Nature*, *436*(7052), 801.
- 260 Kropff, E., & Treves, A. (2008). The emergence of grid cells: Intelligent design or just adaptation?  
261 *Hippocampus*, *18*(12), 1256-1269.
- 262 Moser, E. I., Moser, M.-B., & Roudi, Y. (2014). Network mechanisms of grid cells. *Philosophical*  
263 *Transactions of the Royal Society B: Biological Sciences*, *369*(1635), 20120511.
- 264 Perez-Escobar, J. A., Kornienko, O., Latuske, P., Kohler, L., & Allen, K. (2016). Visual landmarks sharpen  
265 grid cell metric and confer context specificity to neurons of the medial entorhinal cortex. *eLife*,  
266 *5*, e16937.
- 267 Sargolini, F., Fyhn, M., Hafting, T., McNaughton, B. L., Witter, M. P., Moser, M. B., & Moser, E. I. (2006).  
268 Conjunctive representation of position, direction, and velocity in entorhinal cortex. *Science*,  
269 *312*(5774), 758-762. doi: 312/5774/758 [pii]10.1126/science.1125572
- 270 Stachenfeld, K. L., Botvinick, M. M., & Gershman, S. J. (2017). The hippocampus as a predictive map.  
271 *Nature Neuroscience*, *20*(11), 1643.
- 272 Tocker, G., Barak, O., & Derdikman, D. (2015). Grid cells correlation structure suggests organized  
273 feedforward projections into superficial layers of the medial entorhinal cortex. *Hippocampus*,  
274 *25*(12), 1599-1613. doi: 10.1002/hipo.22481
- 275 Zilli, E. A. (2012). Models of grid cell spatial firing published 2005-2011. [Review]. *Frontiers in Neural*  
276 *Circuits*, *6*. doi: 10.3389/fncir.2012.00016

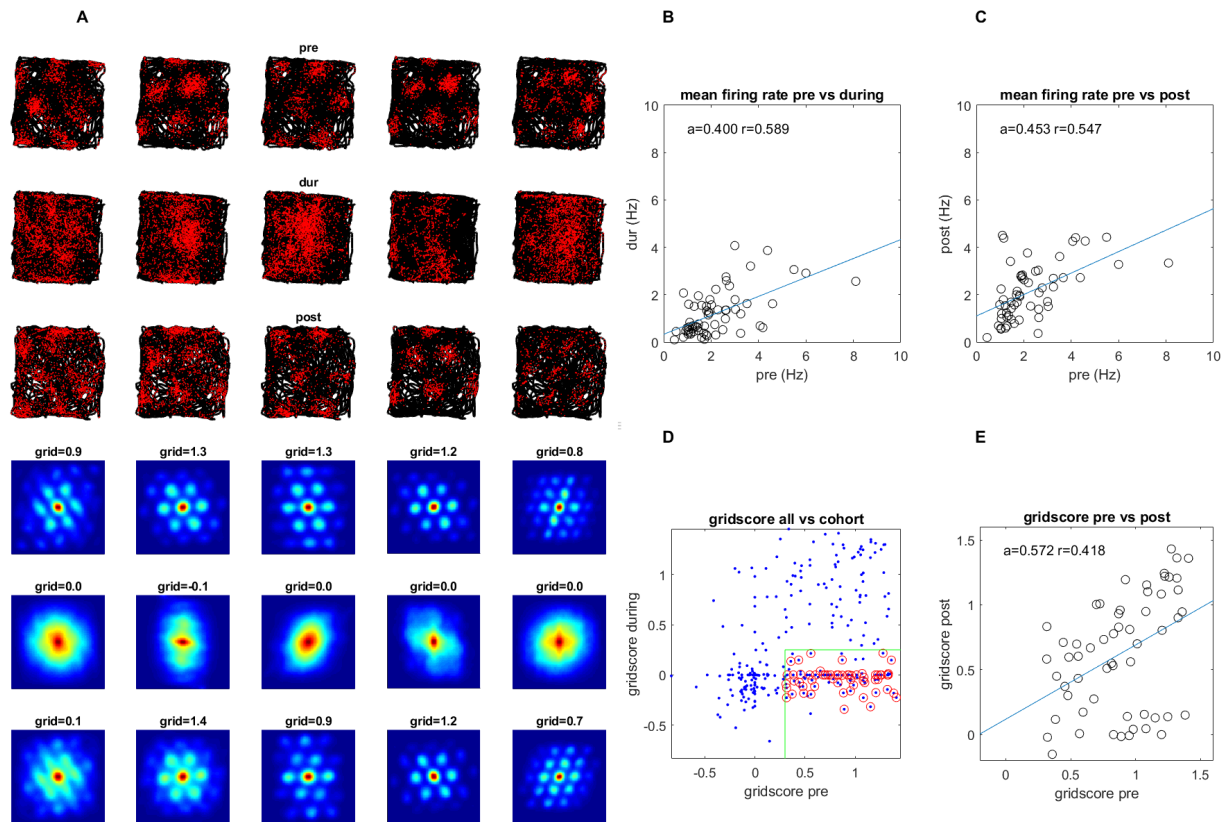

**Figure 1.** A survey of the grid cell population included in the study. Recordings were made pre-, during, and post-injection of muscimol to the hippocampus. **(A)** A sample group of 5 simultaneously recorded grid cells, one cell per column. The first three plots in each column show the location of a single cell firing (red) along the rat's trajectory (black) in a square arena pre-, during, and post-hippocampal inactivation, respectively. The last three plots in each column show the autocorrelation of the firing rate map and the grid score of that session pre-, during, and post inactivation. **(B)** The mean firing rate for the 63 grid cells included in the study pre- vs. during inactivation. **(C)** Same as (B) but for pre- vs. post-inactivation. **(D)** The grid score of all cells in the dataset vs. those included in the study. Green lines show the score thresholds used to select the cells for the cohort, red circles show the cells that were ultimately included in the study after applying grid score and other criteria (note that cells whose grid scores could not be calculated were set to 0, see methods). **(E)** Grid score pre- and post- inactivation of the cells included in the study.

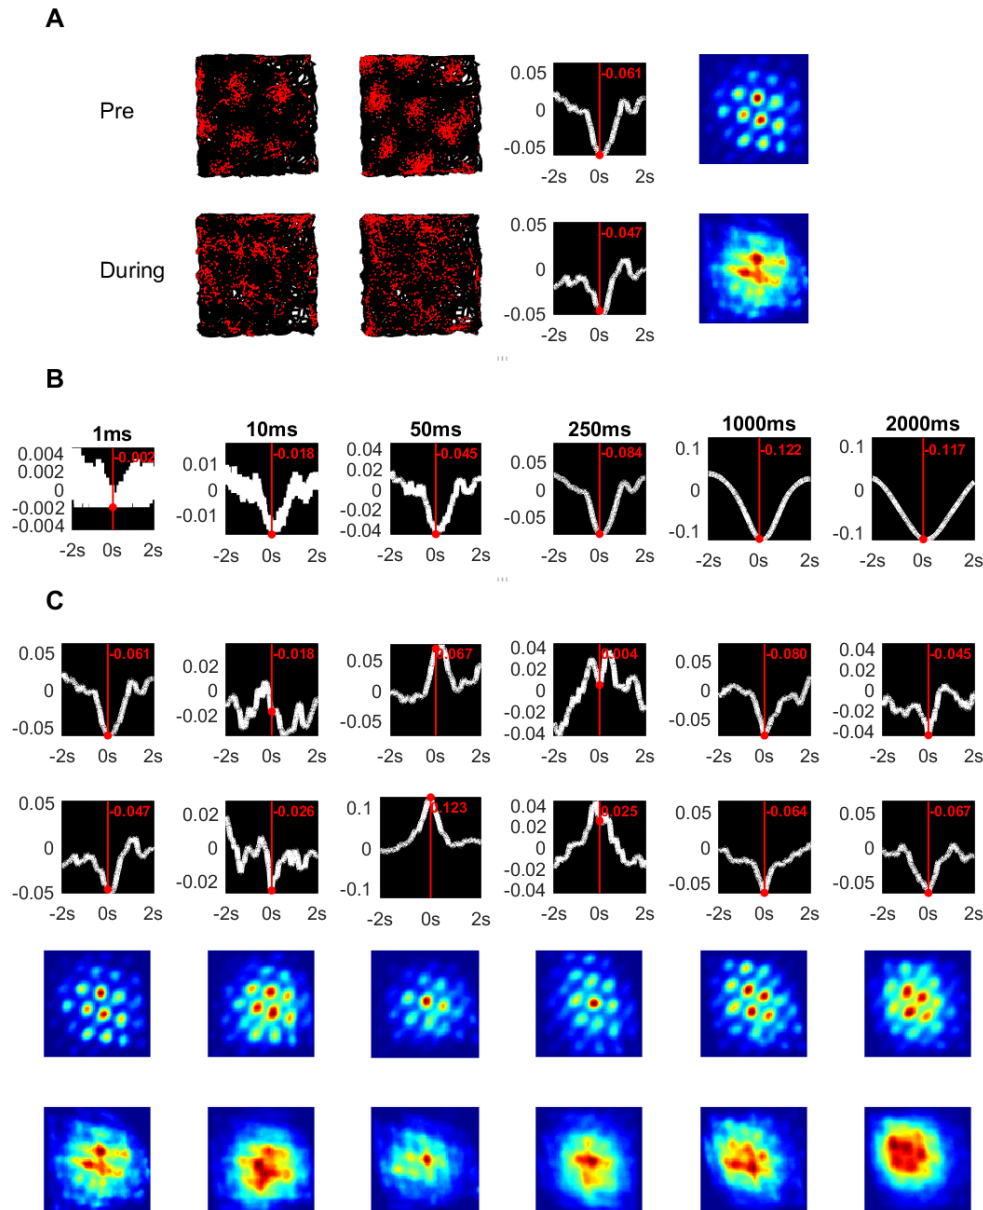

**Figure 2.** Temporal and spatial cross correlations of simultaneously recorded grid cells pre- and during hippocampal inactivation. **(A)** An example of a pair of simultaneously recorded grid cells (columns 1, 2) and their temporal and spatial cross correlation. The rows show pre- and during inactivation data, respectively. **(B)** The effect of smoothing the spike train on the temporal cross correlation using different window lengths with a moving average filter. **(C)** The temporal and spatial cross correlations of cell pairs of an entire group of simultaneously recorded grid cells. Rows 1, 2 show temporal cross correlations pre- and during inactivation; rows 3, 4 show the same for spatial correlations.

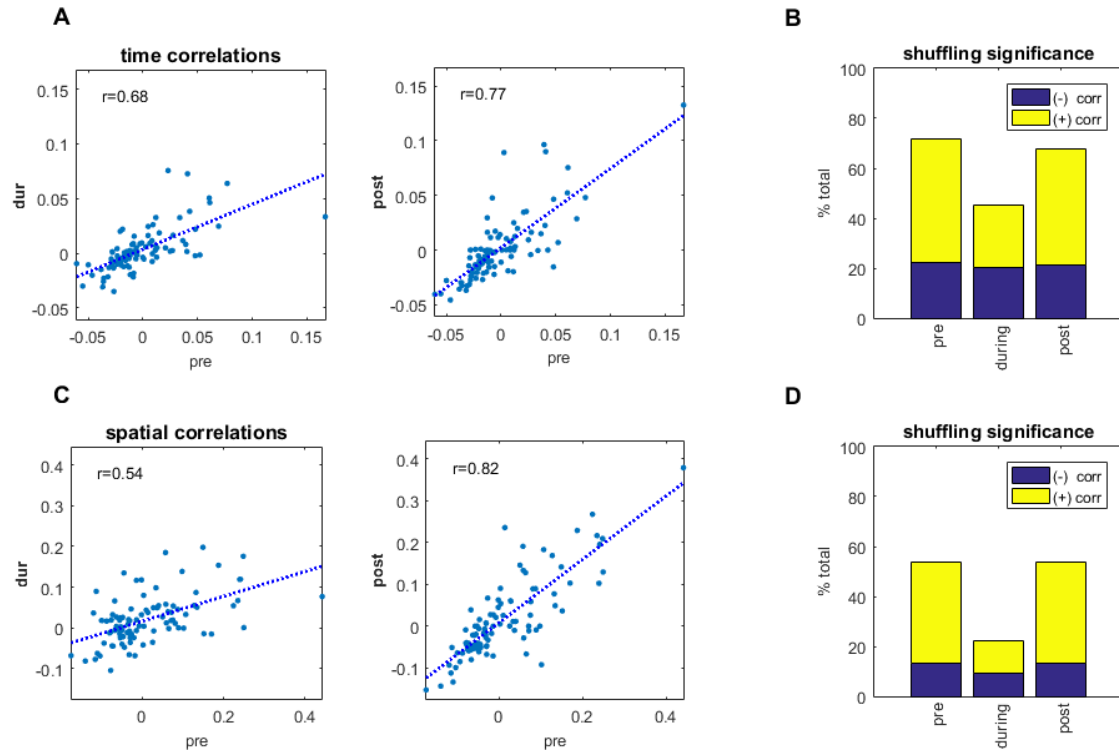

**Figure 3 (with 6 supplements).** Temporal and spatial cross correlations pre- and during inactivation. **(A)** Temporal cross correlations pre- and during inactivation, and also pre- and post- inactivation **(B)** Proportions of significant temporal cross correlations, according to shuffling measures, pre-, during, and post-inactivation, including the sign (positive, negative) of the correlation value. **(C)** Same as **(A)** but for spatial cross correlations of the firing pattern in the arena at [0,0]. **(D)** Same as **(B)** but for spatial cross correlations of the firing pattern in the arena at [0,0].

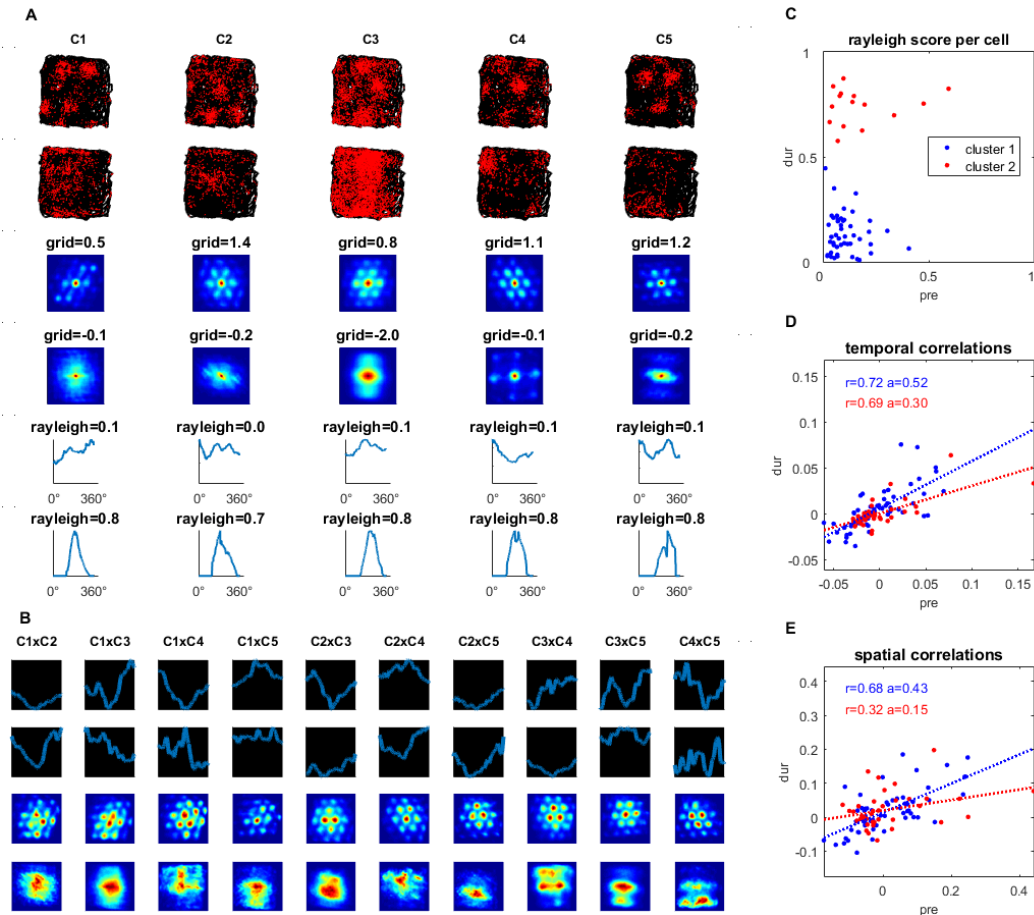

**Figure 4 (with 1 supplement).** Simultaneously recorded grid cells that became head directional during hippocampal inactivation. **(A)** A sample group of 5 simultaneously recorded grid cells, one cell per column. The first two plots in each column show the location of a single cell firing (red) along the rat's trajectory (black) in a square arena pre- and during hippocampal inactivation. Next, two plots show the autocorrelation of the firing rate map and the associated grid score pre- and during inactivation. The last two plots in the column show the firing rate by head direction for an associated Rayleigh Score, pre and during inactivation. **(B)** Temporal and spatial correlations for each cell pair of the group, pre- and during inactivation by column. For temporal correlations (rows 1 and 2), the y-axis represents the correlation value and the x-axis the time lag, ranging from -2s to 2s; no lag, (0s lag) is midway on the x-axis. **(C)** Rayleigh scores pre- and during inactivation for all cells in the cohort clustered by low head directionality (Rayleigh Score < 0.55) during inactivation (blue) and high head directionality (Rayleigh Score > 0.55, red) **(D)** Temporal correlations pre- and during inactivation grouped by head directionality clusters defined in (C), with the correlation coefficient and trendline slope. **(E)** Same as (D) but for spatial correlations.

## Supplement Figures

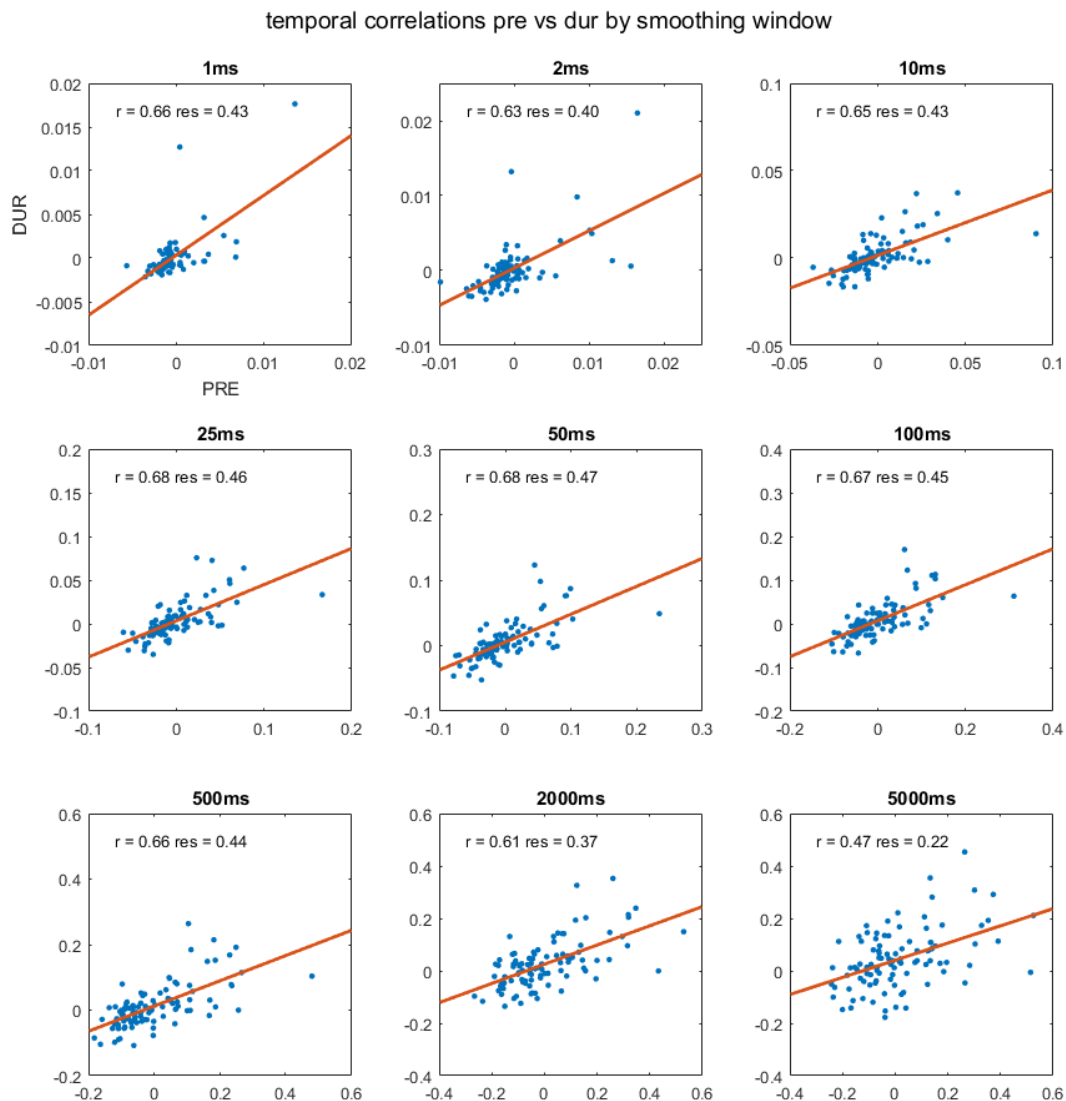

**Figure 3-figure supplement 1.** A plot of temporal cross correlations of the cells in our cohort pre- vs. during hippocampal inactivation, across nine smoothing windows, from 1ms to 5000ms. Spike trains were smoothed using a moving average.

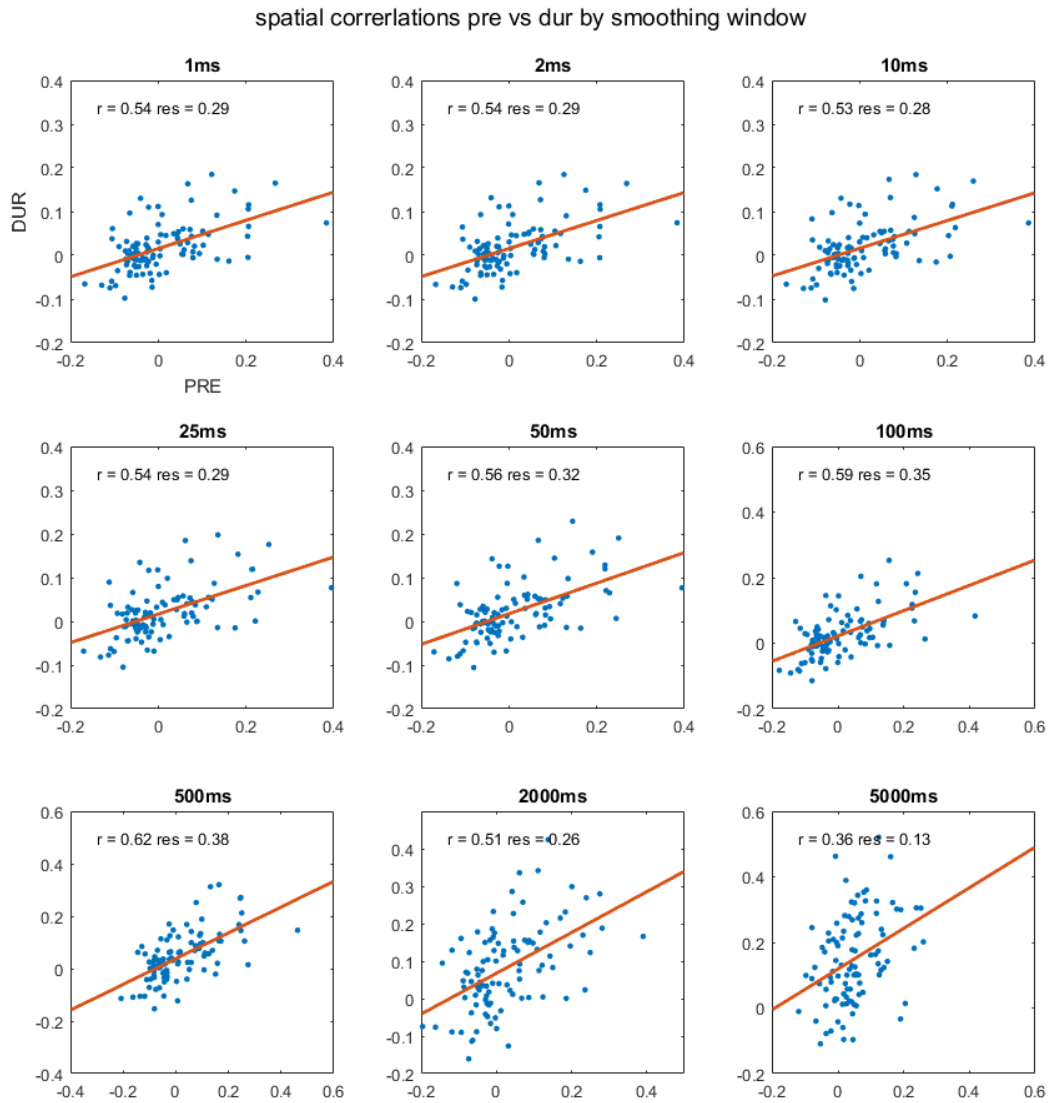

**Figure 3-figure supplement 2.** A plot of spatial cross correlations at [0,0] of the cells in our cohort pre- vs. during hippocampal inactivation, across nine smoothing windows, from 1ms to 5000ms. Spike trains were smoothed using a moving average.



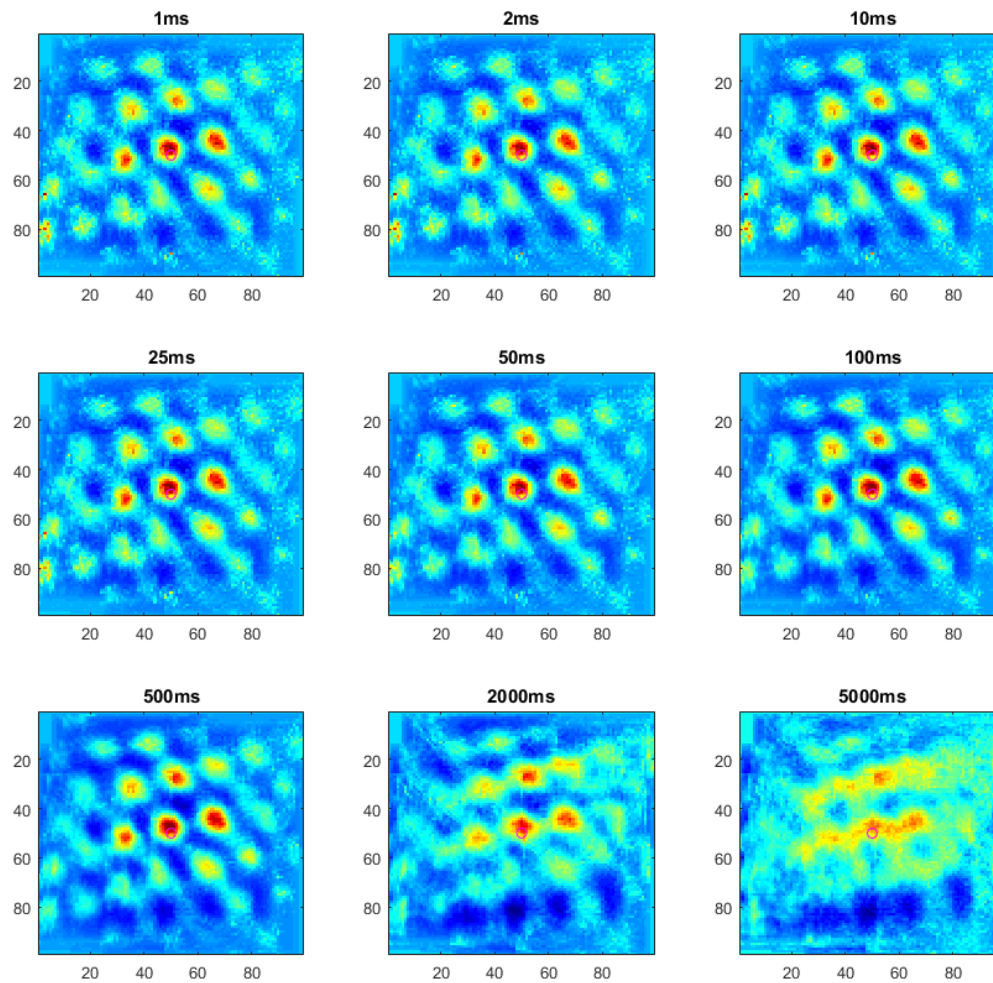

**Figure 3-figure supplement 3.** A single example of spatial cross correlation between two grid cells, pre-hippocampal inactivation across nine smoothing windows, from 1ms to 5000ms. Spike trains were smoothed using a moving average.

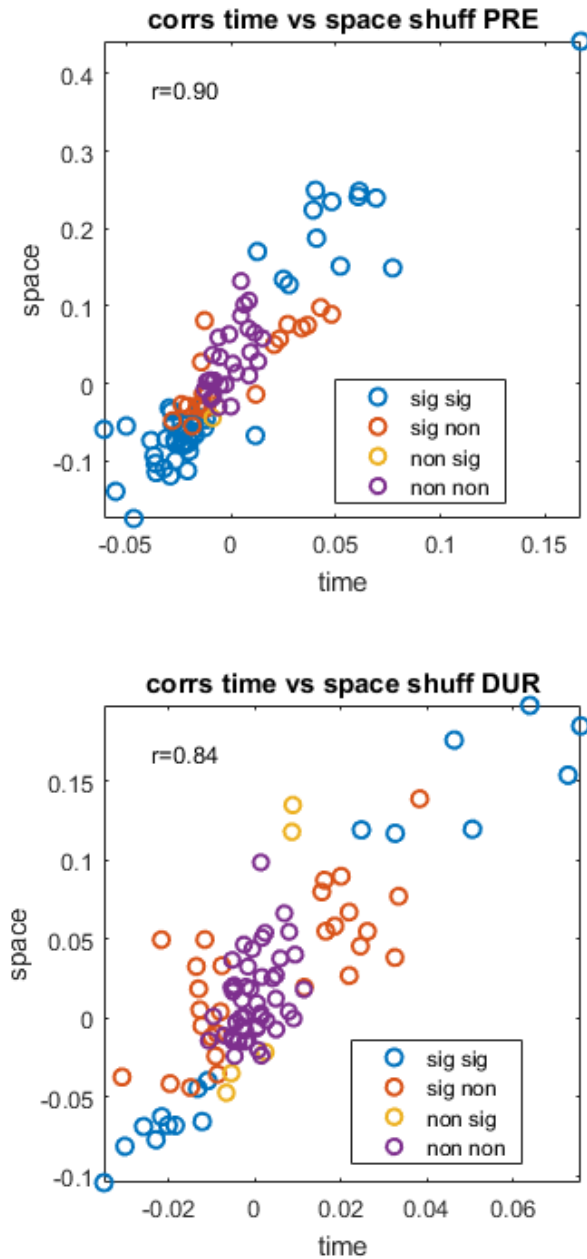

**Figure 3-figure supplement 4.** Temporal correlations plotted against spatial correlations for the cell pairs in our cohort, highlighted by significance pre- (top) and during inactivation (bottom). The legend shows temporal significance followed by spatial significance, with either being significant (sig) or non-significant (non).

correlations by muscimol time window (row 1 temporal, row 2 spatial)

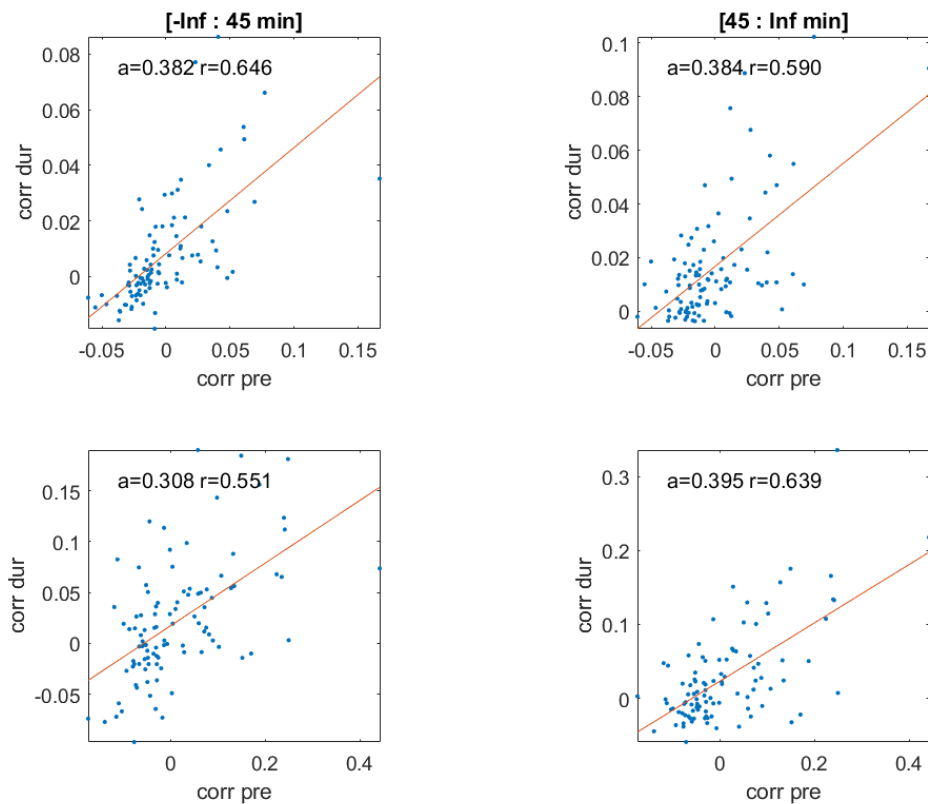

**Figure 3-figure supplement 5.** Temporal correlations pre-inactivation plotted against the recording period during inactivation used in this analysis; all recordings after muscimol injections are up to 45 minutes (top left) and all remaining recordings after 45 minutes (top right) of the muscimol recording session, including slope of the regression line (a) and the Pearson correlation (r). The second row shows the same plots for spatial correlations. Note: because recordings had different starting and ending times, [-Inf, Inf] are used to signify the start and end of the recording time; on average, recordings started 10 minutes after the injection and ended 115 minutes after the injection.

### Mean Grid Score vs Correlation

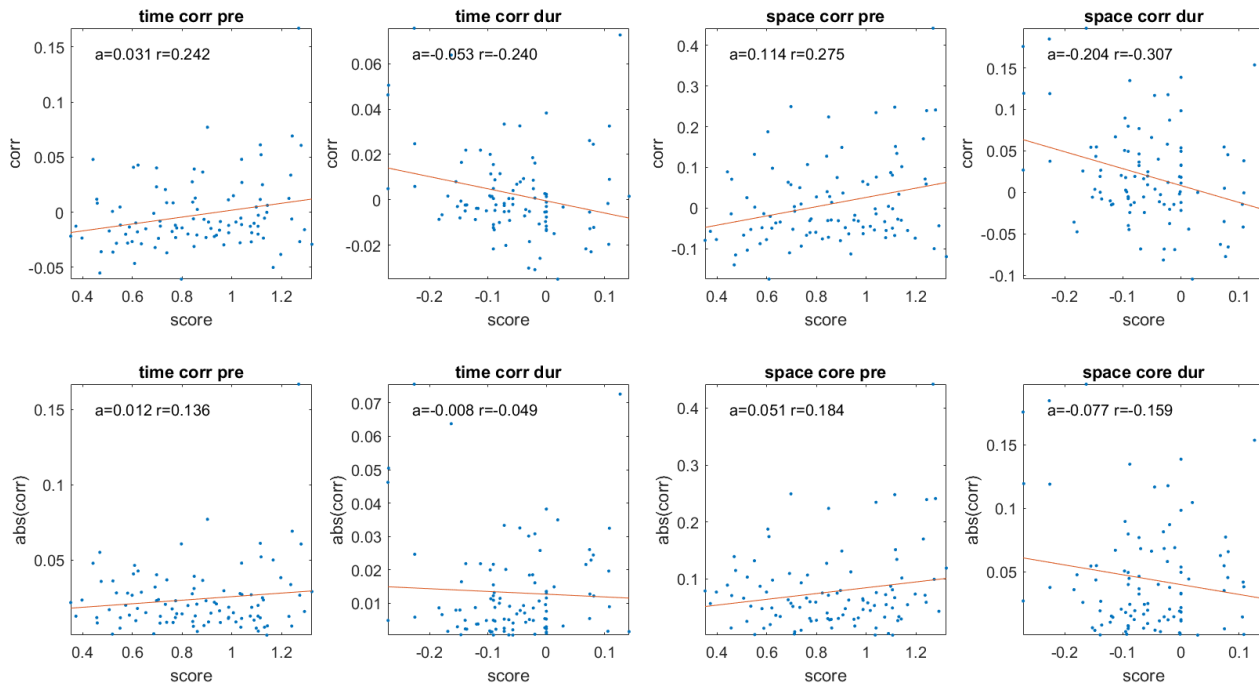

**Figure 3-figure supplement 6.** Temporal and spatial correlations for cell pairs pre- and during inactivation plotted against their average grid score, including the slope of the regression line (a) and the Pearson correlation (r). The second row shows the same plots for absolute correlation values.

### Mean Firing Rate (row 1 before, row 2 during)

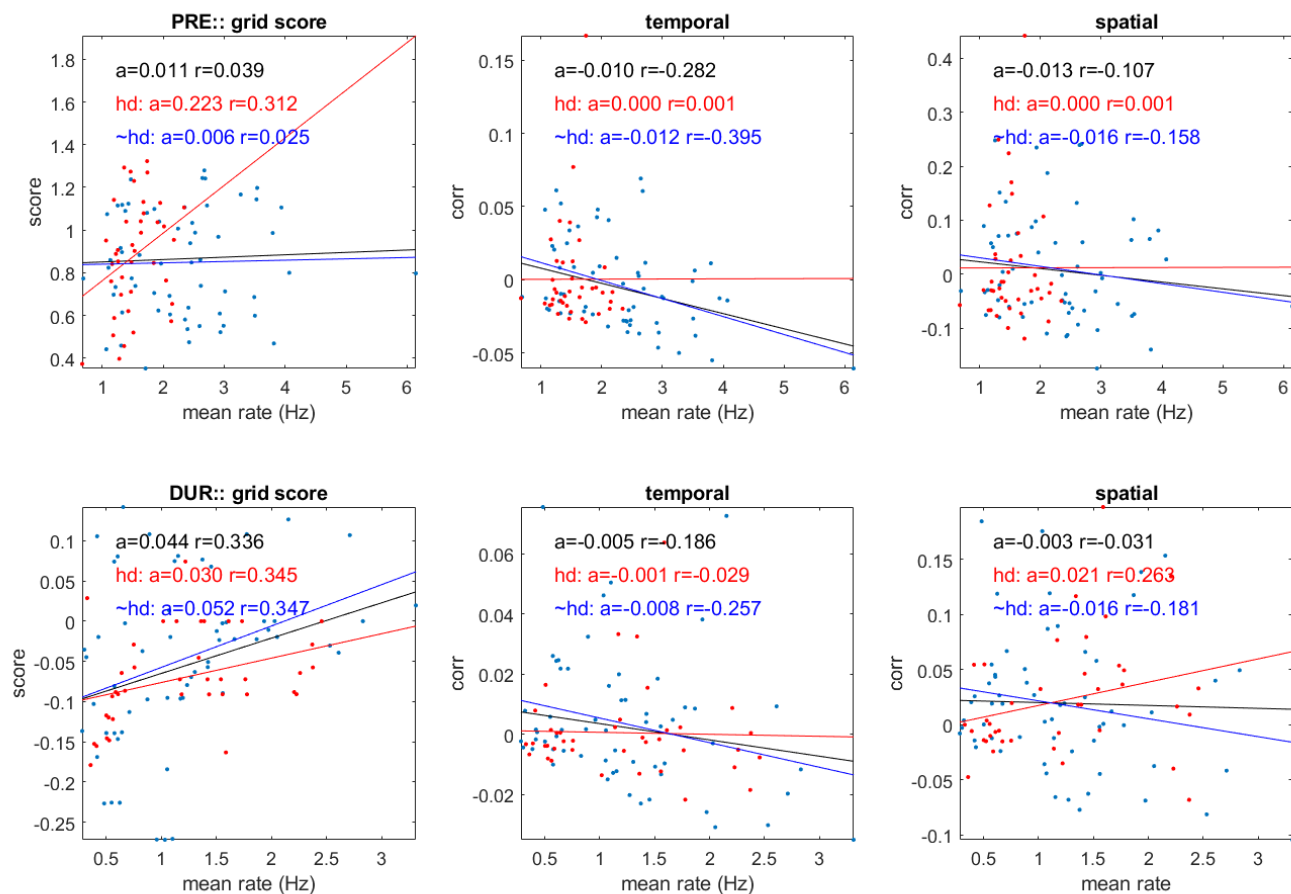

**Figure 4-figure supplement 1.** The mean firing rate of cell pairs plotted against their mean grid score, temporal and spatial correlations, pre- and during inactivation, rows (1 and 2, respectively), grouped by cells with head directionality during inactivation (red), without (blue), and all (black), including the slope of the regression line (a) and Pearson correlation (r).
